# Supplementary material for: Cytological-energy analysis of pleural effusions with predominance of neutrophils
Source: PubMed Central journal article supplement — Ther Adv Respir Dis. 2020 Jun 29;14:1753466620935772. doi: 10.1177/1753466620935772 (PMC7328477; doi:10.1177/1753466620935772), 2020-06-29
Supplement: Reviewer_1_v.2.pdf [file Reviewer_1_v.2.pdf]

Reviewer 1 v.2

Comments to the Author

I had previously reviewed the manuscript.

What is the difference between a purulent parapneumonic pleural effusion and an empyema? By definition an effusion that is purulent(has pus) is an empyema by Light's textbook. How is empyema defined in the study?

What were the gold standards for each diagnostic category?

Describe the randomized sampling process
