# Supplementary material for: Cytological-energy analysis of pleural effusions with predominance of neutrophils
Source: PubMed Central journal article supplement — Ther Adv Respir Dis. 2020 Jun 29;14:1753466620935772. doi: 10.1177/1753466620935772 (PMC7328477; doi:10.1177/1753466620935772), 2020-06-29
Supplement: Reviewer_1_v.3.pdf [file Reviewer_1_v.3.pdf]

Reviewer 1 v.3

Comments to the Author

The authors have submitted a revision of their manuscript on a biophysical analysis of pleural fluid to determine a difference in chest empyema. The definition of exudate is different than the commonly (Light) recognized definition. The authors should change the term 'exudate' to complicated exudate.

The authors have now described a relevant application of their findings (cardiac surgery).
