# Supplementary material for: Cytological-energy analysis of pleural effusions with predominance of neutrophils
Source: PubMed Central journal article supplement — Ther Adv Respir Dis. 2020 Jun 29;14:1753466620935772. doi: 10.1177/1753466620935772 (PMC7328477; doi:10.1177/1753466620935772), 2020-06-29
Supplement: Reviewer_2_v.2.pdf [file Reviewer_2_v.2.pdf]

Reviewer 2 v.2

Comments to the Author

To the authors

TAR-20-017. Matuchova et al. Cytological-energy analysis of pleural effusions with predominance of neutrophils.

The authors have made revisions and provided explanations in line with the recommendations. These have been incorporated into the manuscript. However, the manuscript remains difficult to read owing to the poor English and grammar used.

Selected areas for consideration of correction are as follows:

Page 4, line 39: 'Subject of our interest....' should read 'The subject...'

Page 4, line 45: 'they can be found them' should read 'they can be found primarily'

Page 4, line 55: The sentence beginning with 'Our aim was to determine..' doesn't make sense. Do you mean to say 'identify' rather than 'determine'?

Page 11, line 32: The sentence beginning 'In this study...' should be re-written – do you mean that the immune reaction patterns are different?

Page 11, line 40: '...concentrations the KEB values allow us better assessment...' would read better as '...concentrations the KEB values allow better assessment...'

Page 11, line 42: '...glucose concentration in pleural effusion is directly dependent on current level in the organism' – Perhaps is better to be more specific about what organism you are referring to and where in the organism (e.g. are you referring to the plasma concentrations in humans?).
